# Supplementary material for: Representations of mpox in UK news media during the 2022 outbreak: a qualitative analysis
Source: Research Square preprint supplement (doi:10.21203/rs.3.rs-7659306/v1), 2025-10-12
Supplement: Supplementary file 1 [file 84621fa06cc901ed79e7f6fe.docx]

**Supplementary material**

**Supplementary Table 1: Table of analysis themes, sub-themes and codes**

| **Theme** | **Sub-theme** | **Codes** |
| --- | --- | --- |
| Mpox characteristics | Natural history and pathogenesis | diagnosis information, disease outcomes, disease outcomes in children, strain of clade, incubation period, symptom description, treatment |
| Epidemiology | number of cases, decline in cases, situation in the UK and other high-income countries, current situation in Africa |
| Origins | lab monkeys, first human cases, first identified in West Africa, geographical history, animal transmission, GBMSM festivals and events |
| Global emergency | global public health response, renaming monkeypox |
| Delivery of health promotion | Public health messaging | disease management and advice {advice about contagiousness, advice to isolate, be alert for symptoms, contact tracing, health seeking advice, risk reduction advice, hard to get advice} sexual health as first line service, public health and health response |
| Risk | anyone can get mpox, men having casual sex at risk, multiple sexual partners, population affected are gay men, risk of mpox becoming endemic, symptoms minimised as no death |
| Transmission | animal or bushmeat transmission, community transmission, child transmission, respiratory transmission, sexual transmission & sexual networks, transmission through human-to-human close contact |
| Vaccination | global vaccine access and demand, running out of vaccine, second dose of vaccine, smallpox vaccination as protection, vaccination access and demand, vaccination effectiveness, vaccine allocation – global equity, vaccine allocation - UK |
| Anchoring to other infectious diseases | Comparison to COVID-19 |  |
| Comparisons to HIV |
| Comparisons to smallpox |
